# Supplementary material
Source: publisher figshare collection journal article supplement (https://gsapubs.figshare.com/articles/dataset/_/12417494)
Supplement: Supplementary file 1 [file 1]

**Supplementary Table S1.** Discharge variability metrics used in this study. Measures of discharge (Q):  $Q_{\text{mean}}$  – mean;  $Q_{\text{max}}$  – maximum;  $Q_{\text{mean}}$  – minimum;  $Q_{50}$  – 50<sup>th</sup> percentile;  $Q_{10}$  – 10<sup>th</sup> percentile;  $Q_{99.863}$  – 99.863<sup>th</sup> percentile (equivalent to 2-year flood (Elliott and Capesius, 2009));  $Q_{\text{WMmax}}$  – maximum of wettest month;  $Q_{\text{WMmin}}$  – minimum of wettest month;  $Q_{\text{Dmax}}$  – daily maximum of a year;  $Q_{\text{Dmin}}$  – daily minimum of the same year;  $\sigma_{Q_{\text{Ymax}}}$  – standard deviation of the annual peak;  $Q_{\text{Ymean}}$  – mean annual peak flood.

| Discharge variability metric                         | Equation                                                               | Reference                                                                |
|------------------------------------------------------|------------------------------------------------------------------------|--------------------------------------------------------------------------|
| $Q_{\text{peak}}$ : discharge peakedness             | $Q_{\text{WMmax}}/Q_{\text{mean}}$                                     | Leier et al., 2005                                                       |
| $Q_{\text{max}}/Q_{10}$ : discharge variability      | $Q_{\text{max}}/Q_{10}$                                                | modified from $Q_{\text{max}}/Q_{\text{min}}$ of Latrubesse et al., 2005 |
| $Q_{\text{max}}/Q_{\text{mean}}$ : flood intensity   | $Q_{\text{max}}/Q_{\text{mean}}$                                       | Latrubesse et al., 2005                                                  |
| $\text{DVI}_a$ : average discharge variability index | $(Q_{\text{WMmax}} - Q_{\text{WMmin}})/Q_{\text{mean}}$                | Plink-Björklund, 2015                                                    |
| $\text{DVI}_y$ : yearly discharge variability index  | $(\sum(Q_{\text{Dmax}} - Q_{\text{Dmin}})/Q_{\text{mean}})/n$<br>years | Hansford et al., 2020                                                    |
| $Q_{99.863}/Q_{50}$ : Flood magnitude                | $Q_{99.863}/Q_{50}$                                                    | Hansford et al., 2020                                                    |
| $\text{CVQ}_p$ : annual peak discharge variance      | $(\sigma_{Q_{\text{Ymax}}})/Q_{\text{Ymean}}$                          | Fielding et al., 2018                                                    |
